# Supplementary material for: Sustained efficacy of artesunate-sulfadoxine-pyrimethamine against Plasmodium falciparum in Yemen and a renewed call for an adjunct single dose primaquine to clear gametocytes
Source: Springer Nature journal article supplement (doi:10.1186/s12936-016-1344-0), 2016-05-27
Supplement: MOESM1 [file 10206164]

## Additional file 1

### Oligonucleotide sequences and cycling conditions for genotyping *msp1*, *msp2* and *glurp*

|                    | Gene/Family | Primer name                         | Primer sequence                        | Thermal conditions                                                                                                                                                                    |
|--------------------|-------------|-------------------------------------|----------------------------------------|---------------------------------------------------------------------------------------------------------------------------------------------------------------------------------------|
| Primary reaction   | MSP-1       | M1-OF                               | 5' -CTAGAAGCTTTAGAAGATGCAGTATTG-3'     | 1 cycle (95°C/5 min, 58°C/2 min, 72°C/2 min)<br>25 cycles (94°C/1 min, 58°C/2 min, 72°C/2 min)<br>Extension at 72°C/2 min<br>Annealing at 58°C/2 min<br>Final extension at 72°C/5 min |
|                    |             | M1-OR                               | 5' -CTTAAATAGTATTCTAATTCAAGTGGATCA-3'  |                                                                                                                                                                                       |
|                    | MSP-2       | M2-OF                               | 5' -ATGAAGGTAATTAACACATTGTCTATTATA-3'  |                                                                                                                                                                                       |
|                    |             | M2-OR                               | 5' -CTTTGTTACCATCGGTACATTCTT-3'        |                                                                                                                                                                                       |
|                    | GLURP       | G-OF                                | 5' -TGAATTTGAAGATGTTCACTGAAC-3'        |                                                                                                                                                                                       |
|                    |             | G-OR                                | 5' -GTGGAATTGCTTTTTTCTTCAACACTAA-3'    |                                                                                                                                                                                       |
| Secondary reaction | MSP1-K1     | M1-KF_FAM                           | /56-FAM/AAATGAAGAAGAAATTACTACAAAAGGTGC | 1 cycle (95°C/5 min, 61°C/2 min, 72°C/2 min)<br>25 cycles (94°C/1 min, 61°C/2 min, 72°C/2 min)<br>Extension at 72°C/2 min<br>Annealing at 61°C/2 min<br>Final extension at 72°C/5 min |
|                    |             | M1-KR                               | 5' -GCTTGCATCAGCTGGAGGGCTTGCACCAGA-3'  |                                                                                                                                                                                       |
|                    | MSP1-MAD20  | M1-MF_FAM                           | /56-FAM/AAATGAAGGAACAAGTGGAACAGCTGTTAC |                                                                                                                                                                                       |
|                    |             | M1-MR                               | 5' -ATCTGAAGGATTTGTACGTCTTGAATTACC-3'  |                                                                                                                                                                                       |
|                    | MSP1-RO33   | M1-RF_FAM                           | /56-FAM/TAAAGGATGGAGCAAATACTCAAGTTGTTG |                                                                                                                                                                                       |
|                    |             | M1-RR                               | 5' -CATCTGAAGGATTTGCAGCACCTGGAGATC-3'  |                                                                                                                                                                                       |
|                    | MSP2-FC27   | M2-FCF_FAM                          | /56-FAM/AATACTAAGAGTGTAGGTGCARATGCTCCA |                                                                                                                                                                                       |
|                    |             | M2-FCR                              | 5' -TTTTATTTGGTGCATTGCCAGAACTTGAAC-3'  |                                                                                                                                                                                       |
|                    | MSP2-IC     | M2-ICF_FAM                          | /56-FAM/AGAAGTATGGCAGAAAGTAAkCCTYCTACT |                                                                                                                                                                                       |
|                    |             | M2-ICR                              | 5' -GATTGTAATTCGGGGGATTCAGTTTGTTCG-3'  |                                                                                                                                                                                       |
| GLURP              | G-NF        | 5' -TGTTCACTGAACAATTAGATTTAGATCA-3' |                                        |                                                                                                                                                                                       |
|                    | G-OR        | 5' -GTGGAATTGCTTTTTTCTTCAACACTAA-3' |                                        |                                                                                                                                                                                       |

**Oligonucleotide sequences and cycling conditions for *PfK13*, *Pfdhfr* and *Pfdhps***

| <b>Gene</b> | <b>PCR</b> | <b>Primer</b> | <b>Sequence</b>                                | <b>Size</b> | <b>Thermal conditions</b>                                                             |
|-------------|------------|---------------|------------------------------------------------|-------------|---------------------------------------------------------------------------------------|
| Pf-Kelch 13 | Single run | K13-F         | GTTGGTGGAGCTATTTTTGAAACATCTAG                  | 1062        | 94°C /5 min<br>40 cycles (94°C/30 sec,<br>60°C/90 sec, 72°C/90<br>sec)<br>72°C/10 min |
|             |            | K13-R         | GCCAAGCTGCCATTCATTTGTATC                       |             |                                                                                       |
| Pfdhfr      | Primary    | Amp1<br>Amp2  | TTTATATTTTCTCCTTTTAA<br>CATTTTATTATTCGTTTTCT   | 718         | 94°C/5 min<br>30 cycles (94°C/30 sec,<br>49°C/60 sec, 72°C/60<br>sec)<br>72°C/5 min   |
|             | Secondary  | SP1<br>SP2    | ATGATGGAACAAGTCTGCGAC<br>ACATTTTATTATTCGTTTTTC | 700         | 94°C /5 min<br>25 cycles (94°C/30 sec,<br>49°C/60 sec, 72°C/60<br>sec)<br>72°C/5 min  |
| Pfdhps      | Primary    | PS1-F<br>O2   | GAATTTTATCCATTCCTCATG<br>TTCCTCATGTAATTCATCTGA | 1028        | 94°C /5 min<br>30 cycles (94°C/60 sec,<br>56°C/2 min, 72°C/60<br>sec)<br>72°C/5 min   |
|             | Secondary  | PSA-F<br>O2   | GTATACAACACACAGATATAG<br>TTCCTCATGTAATTCATCTGA | 1005        | 94°C/5 min<br>25 cycles (94°C/60 sec,<br>56°C/2 min, 72°C/60<br>sec)<br>72°C/5 min    |
