# Supplementary material for: Sustained efficacy of artesunate-sulfadoxine-pyrimethamine against Plasmodium falciparum in Yemen and a renewed call for an adjunct single dose primaquine to clear gametocytes
Source: Springer Nature journal article supplement (doi:10.1186/s12936-016-1344-0), 2016-05-27
Supplement: MOESM2 [file 10206164]

**Additional file 2 Parasitaemia clearance and re-appearance of the five recrudescence/re-infection cases**

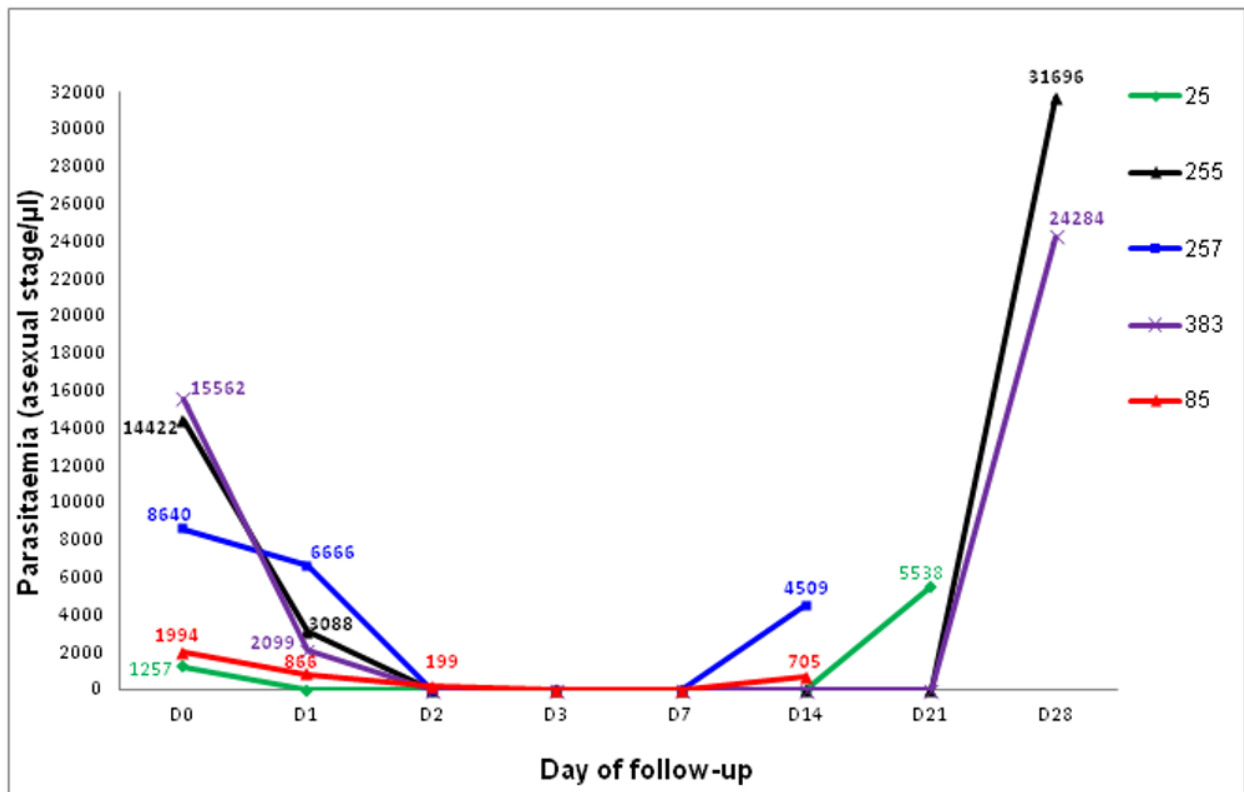

Patient identification numbers are in the panel on the right.
