# Supplementary material for: Sustained efficacy of artesunate-sulfadoxine-pyrimethamine against Plasmodium falciparum in Yemen and a renewed call for an adjunct single dose primaquine to clear gametocytes
Source: Springer Nature journal article supplement (doi:10.1186/s12936-016-1344-0), 2016-05-27
Supplement: MOESM3 [file 10206164]

**Additional file 3 Genotyping data for the five patients with renewed clinical activity during follow-up\***

| ID  | Day | <i>m</i> sp1 |       | <i>m</i> sp2 |      |     | <i>glurp</i> | Outcome       |
|-----|-----|--------------|-------|--------------|------|-----|--------------|---------------|
|     |     | K1           | MAD20 | RO33         | FC27 | IC  |              |               |
| 25  | 0   | 180          | -     | -            | 300  | -   | 1,000        | Recrudescence |
|     | 21  | 180          | -     | -            | 300  | -   | 1,000        |               |
| 85  | 0   | -            | -     | 150          | 450  | -   | 900          | New infection |
|     | 14  | 200          | -     | -            | -    | 500 | 1,000        |               |
| 255 | 0   | 180          | -     | -            | -    | 500 | 1,000        | Recrudescence |
|     | 28  | 180          | -     | -            | -    | 500 | 1,000        |               |
| 257 | 0   | 180          | -     | 150          | 300  | 600 | 900          | Recrudescence |
|     | 14  | 180          | -     | 150          | 300  | 600 | 900          |               |
| 383 | 0   | 200          | -     | -            | 350  | -   | 900          | New infection |
|     | 28  | -            | 230   | -            | 280  | -   | 900          |               |

\* The frequency of the recrudescence allelic variants observed in the study area was as the following: MSP1-K1-180-200 bp=12.5%; MSP1-MAD20-230 bp=32.5%; MSP1-RO33 150 bp=25%; MSP2-FC27-280-300 bp=13.2%; MSP2-FC27-350 bp=27.9%; MSP2-FC27-450 bp=13.2%; MSP2-IC-500 bp=5.9%; MSP2-IC-600 bp=39.7%; GLURP 900 bp=33%; GLURP 1,000 bp=30.5%.
